# Supplementary material for: Structural and electronic properties of Pd-decorated graphene oxides and their effects on the adsorption of nitrogen oxides: insights from density functional calculations
Source: Royal Society of Chemistry journal article supplement (doi:10.1039/c4ra03910f), 2014-01-01
Supplement: c4ra03910f1.pdf [file c4ra03910f1.pdf]

## Supporting Information

### **Structural and electronic properties of Pd-decorated graphene oxides and their effects on the adsorption of nitrogen oxides: insights from density functional calculations**

Shaobin Tang\* and Jiayi Zhu

*Key Laboratory of Organo-Pharmaceutical Chemistry of Jiangxi Province, Gannan Normal University, Ganzhou 341000, China*

\* E-mail address: [tsb1980@xmu.edu.cn](mailto:tsb1980@xmu.edu.cn)

**Table S1: Summary of calculated results for the adsorption of Pd on rGOs with both hydroxyl and epoxy groups: the binding energy ( $E_b$ ), the distance between Pd and its neighboring C ( $d_1$ ), and O ( $d_2$ ) atoms.**

| Structure     | binding site | $E_b$ (eV) | $d_1$ (Å) | $d_2$ (Å)  |
|---------------|--------------|------------|-----------|------------|
| Pd@G-O-OH-1a  | C            | 1.45       | 2.12      | 2.42       |
| Pd@G-O-OH-1b  | C and O      | 2.25       | 2.13      | 2.06       |
| Pd@G-O-OH-2a  | C            | 1.06       | 2.25      |            |
| Pd@G-O-OH-2b  | C and O      | 1.36       | 2.13      | 2.07       |
| Pd@G-O-OH-2c  | O            | 0.08       | 2         |            |
| Pd@G-2O-OH-1a | C            | 1.63       | 2.1       | 2.69       |
| Pd@G-2O-OH-1b | O            | 2.25       |           | 2.04 (2.3) |
| Pd@G-2O-OH-1c | O            | 2.66       |           | 1.97       |
| Pd@G-2O-OH-1d | O            | 2.58       |           | 1.96       |
| Pd@G-2O-OH-2  | C and O      | 1.78       | 2.08      | 2.05       |

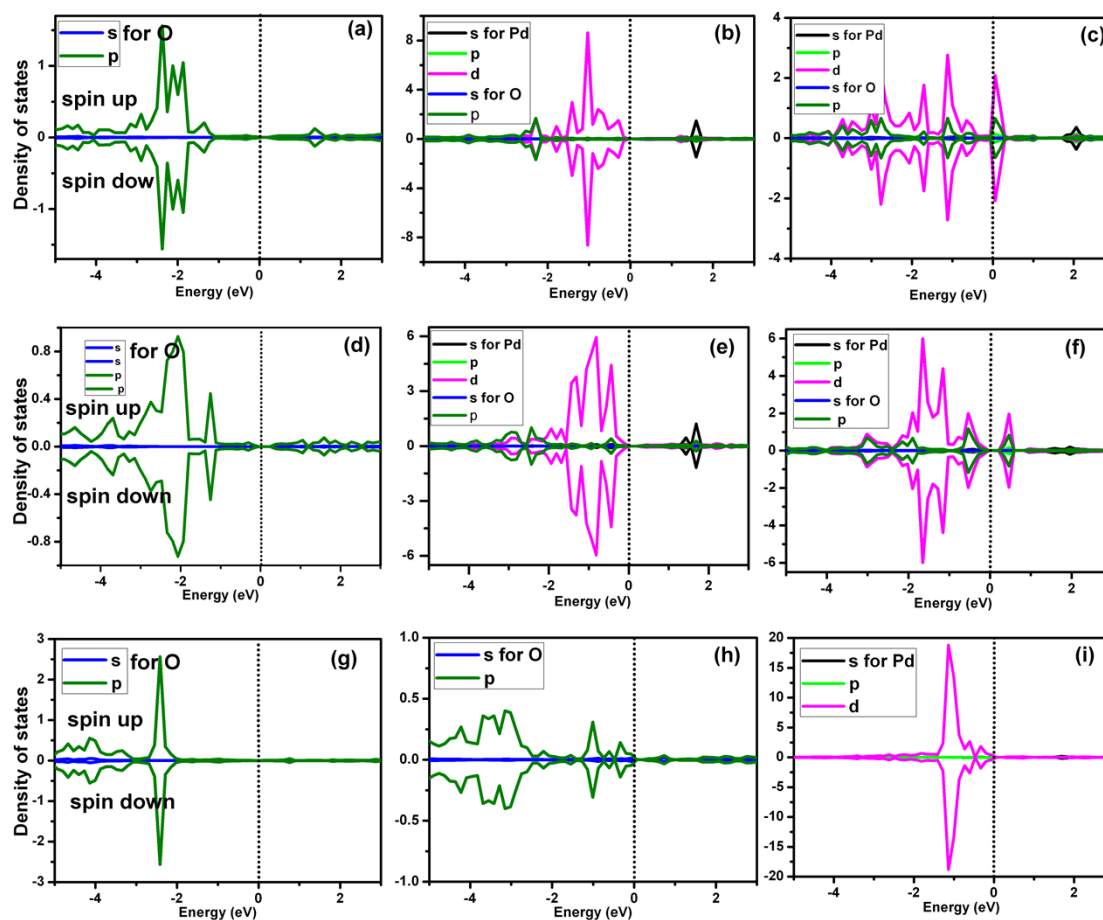

**Figure S1.** The spin-polarized Projected density of states (PDOS) of O atom from GO before and after Pd interaction and the PDOS of adsorbed Pd for Pd-decorated GOs. (a) G-2O-1, (b) Pd@G-2O-1a, (c) Pd@G-2O-1c, (d) G-2O-2, (e) Pd@G-2O-2a, (f)

Pd@G-2O-2b, (g) G-2OH-2, and (h)-(i) Pd@G-2OH-2. The Fermi level is set to 0.

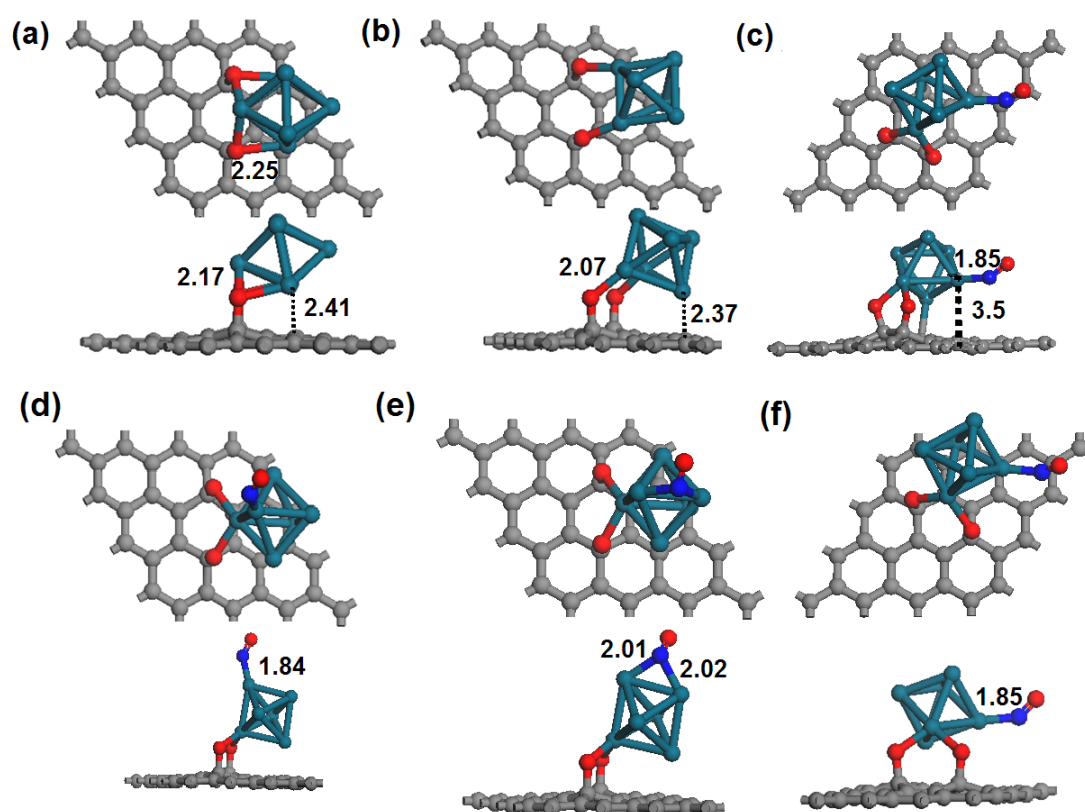

**Figure S2.** Top and side views of optimized structure (distance in Å) for Pd<sub>6</sub> deposited on G-2O-1 (a)-(b) and NO adsorbed on Pd<sub>6</sub>-rGO hybrid (e)-(h). (a) Pd<sub>6</sub>@G-2O-1-c and (b) Pd<sub>6</sub>@G-2O-1-d. Adsorption of NO at (c) Pd<sub>5</sub> site of Pd<sub>6</sub>@G-2O-1-a and (d)-(f) various Pd sites of Pd<sub>6</sub>@G-2O-1-b.

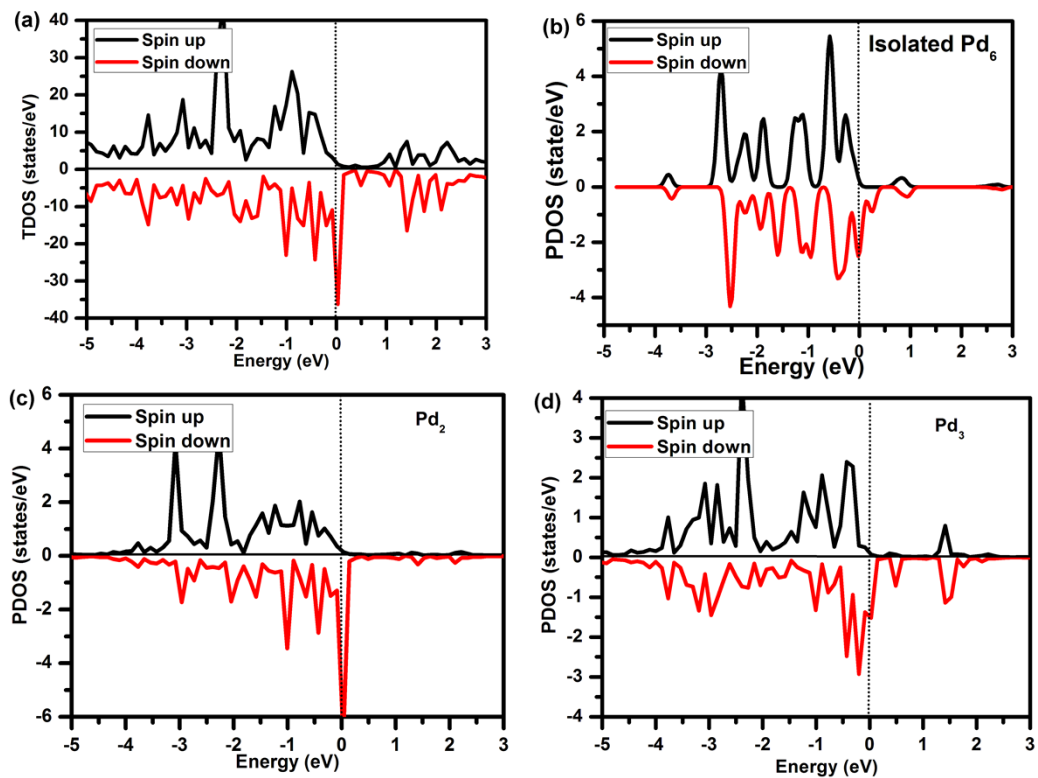

**Figure S3.** The spin-polarized TDOS and PDOS of Pd atom for isolated Pd<sub>6</sub> cluster and Pd cluster adsorbed rGO. (a) Pd<sub>6</sub>@ G-2O-1-a and (b) one Pd atom, (c) Pd<sub>2</sub> and (d) Pd<sub>3</sub> of Pd<sub>6</sub>@ G-2O-1-a. The Fermi level is set to 0.
